# Supplementary material for: Impact of the degradation leachate of the polyacrylonitrile-based material UP2W on the retention of Ni(ii), Eu(iii) and Pu(iv) by cement
Source: Royal Society of Chemistry journal article supplement (doi:10.1039/d3dt02122j), 2023-01-01
Supplement: d3dt02122j1.pdf [file d3dt02122j1.pdf]

*Supplementary Data for*

**IMPACT OF THE DEGRADATION LEACHATE OF THE POLYACRYLONITRILE-BASED MATERIAL UP2W ON THE RETENTION OF Ni(II), Eu(III) AND Pu(IV) BY CEMENT**

P. G. Szabo<sup>1</sup>, A. G. Tasi<sup>1</sup>, X. Gaona<sup>1,\*</sup>, A. C. Maier<sup>2</sup>, S. Hedström<sup>2</sup>, M. Altmaier<sup>1</sup>, H. Geckeis<sup>1</sup>

<sup>1</sup>Karlsruhe Institute of Technology, Institute for Nuclear Waste Disposal, P.O. Box 3640, 76021 Karlsruhe, Germany

<sup>2</sup>Svensk Kärnbränslehantering AB, Evenemangsgatan 13, Box 3091, 169 03, Solna, Sweden

\*corresponding author:

E-mail addresses: xavier.gaona@kit.edu



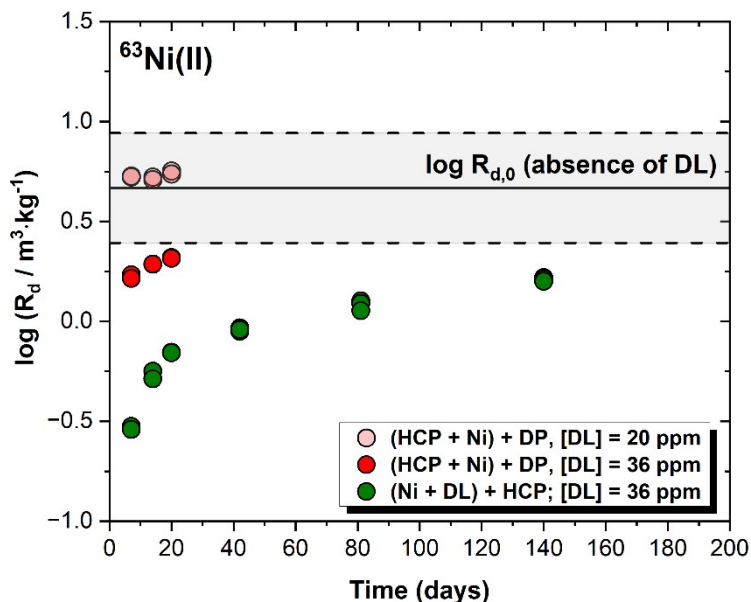

**Figure SI-1.** Kinetics for the uptake of  $^{63}\text{Ni(II)}$  by HCP in the presence of UP2W degradation leachates at  $S:L = 1 \text{ g} \cdot \text{dm}^{-3}$ . Red and green symbols correspond to experiments conducted following the order of addition “(HCP + Ni) + DL” and “(Ni + DL) + HCP”, respectively. Solid / dashed lines correspond to  $R_d$  values for the uptake of  $^{63}\text{Ni(II)}$  by HCP in the absence of degradation leachates.

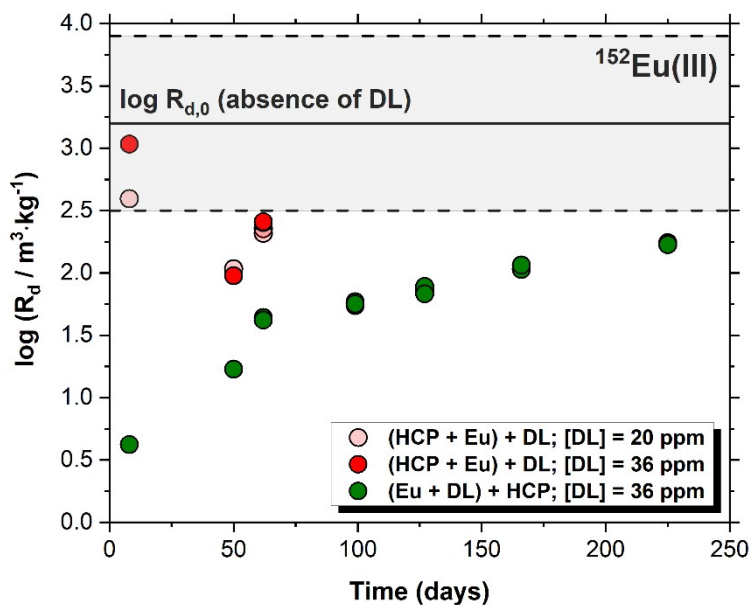

**Figure SI-2.** Kinetics for the uptake of  $^{152}\text{Eu(III)}$  by HCP in the presence of UP2W degradation leachates at  $S:L = 1 \text{ g} \cdot \text{dm}^{-3}$ . Red and green symbols correspond to experiments conducted following the order of addition “(HCP + Eu) + DL” and “(Eu + DL) + HCP”, respectively. Solid / dashed lines correspond to  $R_d$  values for the uptake of  $^{152}\text{Eu(III)}$  by HCP in the absence of degradation leachates.

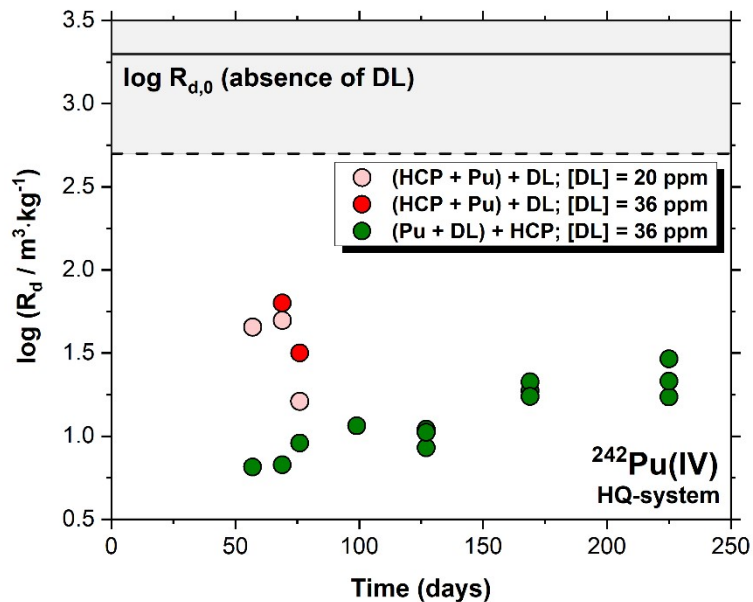

**Figure SI-3.** Kinetics for the uptake of  $^{242}\text{Pu}(\text{IV})$  by HCP in the presence of UP2W degradation leachates at  $S:L = 1 \text{ g} \cdot \text{dm}^{-3}$ . Red and green symbols correspond to experiments conducted following the order of addition “(HCP + Pu) + DL” and “(Pu + DL) + HCP”, respectively. Solid / dashed lines correspond to  $R_d$  values for the uptake of  $^{63}\text{Ni}(\text{II})$  by HCP in the absence of degradation leachates.
